# Supplementary material for: A high-performance organic–inorganic self-powered broadband photodetector based on PANI/Bi 2 O 2 S nanocomposites
Source: Royal Society of Chemistry journal article supplement (doi:10.1039/d4tc02520b), 2024-01-01
Supplement: d4tc02520b1.pdf [file d4tc02520b1.pdf]

**A high-performance organic-inorganic self-powered broadband  
photodetector based on PANI/Bi<sub>2</sub>O<sub>2</sub>S nanocomposites**

Bingwei Li <sup>a,1</sup>, Kai Wang <sup>b,1</sup>, Nanyin Zhao <sup>a</sup>, Zhentao Fu <sup>a</sup>, Mingtao Wang <sup>a</sup>,  
Zhuoqiao Xie <sup>a</sup>, Jun Li <sup>a\*</sup>

*a. Hunan Provincial Key Laboratory of Micro-Nano Energy Materials and Devices  
and School of Physics and Optoelectronics, Xiangtan University, Hunan 411105, P R*

*China*

*b. Key Laboratory of MEMS of the Ministry of Education Southeast University  
Nanjing 210096, China*

---

<sup>1</sup> These authors contributed equally to this work.

\* Corresponding author. E-mail addresses: [lijun@xtu.edu.cn](mailto:lijun@xtu.edu.cn)

## Theoretical calculation

In this paper, the Density Functional Theory (DFT) calculations were performed by the Vienna Ab-initio Simulation Package (VASP).<sup>1, 2</sup> Also, The Bi<sub>2</sub>O<sub>2</sub>S was optimized with a less than 0.01 eV atom<sup>-1</sup> residual force on per atom. For the exchange-correlation potentials, we adopted Perdew-Burke-Ernzerhof (PBE) within the Generalized Gradient Approximation (GGA).<sup>3</sup> The energy cutoff was 500 eV, and the Brillouin zone integration was performed using a k-point grid of (16×16×16). After optimization, the lattice constants of Bi<sub>2</sub>O<sub>2</sub>S are 3.85 Å along the x and y directions and 12.06 Å along the z direction. The Bi-O and Bi-Bi bond lengths are 2.319 Å and 3.444 Å, respectively.

Table S1 Responsivity in different wavelength

| Wavelength Concentration | Power Density          | Photocurrent Density     | Responsivity |
|--------------------------|------------------------|--------------------------|--------------|
| 350nm                    | 100 μW/cm <sup>2</sup> | 2.95 μA/cm <sup>2</sup>  | 29.5 mA/W    |
| 365nm                    | 150 μW/cm <sup>2</sup> | 1.72 μA/cm <sup>2</sup>  | 11.5mA/W     |
| 546nm                    | 100 μW/cm <sup>2</sup> | 1.15 μA /cm <sup>2</sup> | 11.5mA/W     |
| 630nm                    | 150 μW/cm <sup>2</sup> | 1.00 μA/cm <sup>2</sup>  | 6.0mA/W      |
| 660nm                    | 170 μW/cm <sup>2</sup> | 0.78 μA/cm <sup>2</sup>  | 4.6mA/W      |
| 700nm                    | 110 μW/cm <sup>2</sup> | 0.58 μA/cm <sup>2</sup>  | 5.3mA/W      |
| 760nm                    | 90 μW/cm <sup>2</sup>  | 0.15μA /cm <sup>2</sup>  | 1.7mA/W      |

Calculated by formula:

$$R=I_p / PS$$

(Where R is the photoresponsivity, I<sub>p</sub> is the photocurrent, P and S is the Power density and Irradiation area, respectively)

Table S2 Performance comparison

| Material                            | Electrolyte Concentration            | Responsivity   | Photoresponse Time (s) | Potential (V) | Ref. |
|-------------------------------------|--------------------------------------|----------------|------------------------|---------------|------|
| This work                           | 0.5M, KOH                            | 29.5 mA/W      | 0.1                    | 0             |      |
| Bi QDs                              | 0.1M KOH                             | 8.64 $\mu$ A/W | 0.2                    | 0.6           | 4    |
| SnSe <sub>2</sub> /WSe <sub>2</sub> | 0.5M KOH                             | 1.03 mA/W      | 0.05                   | 0.6           | 5    |
| InSe NSs                            | 0.3M KOH                             | 10.14 mA/W     | 0.002                  | 0             | 6    |
| Ga <sub>2</sub> O <sub>3</sub>      | 0.5M Na <sub>2</sub> SO <sub>4</sub> | 3.81 mA/W      | 0.5                    | 0             | 7    |
| GeH NSs                             | 0.5M Na <sub>2</sub> SO <sub>4</sub> | 24 $\mu$ A/W   | 0.24                   | 0             | 8    |
| Sb NSs                              | 0.5M KOH                             | 1.5 $\mu$ A/W  | 1                      | 0.6           | 9    |
| GeSe NSs                            | 0.5M H <sub>2</sub> SO <sub>4</sub>  | 0.16 $\mu$ A/W | 0.855                  | -0.3          | 10   |

The charge transfer mechanism can be explained by the following equation:

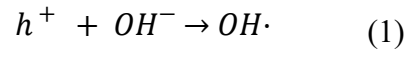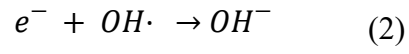

Figure S1 Theoretical prediction of the band structure of  $\text{Bi}_2\text{O}_2\text{S}$ .

Figure S2 I-V spectra of the composite structure.

Figure S3 Performance comparison between different semiconductor materials.

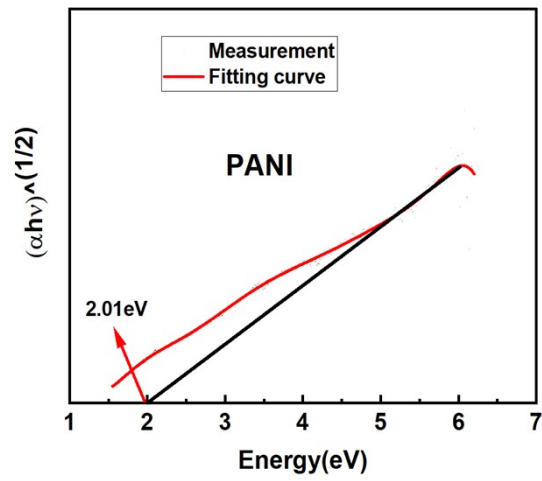

**Figure S1** Theoretical prediction of the band structure of  $\text{Bi}_2\text{O}_2\text{S}$ .

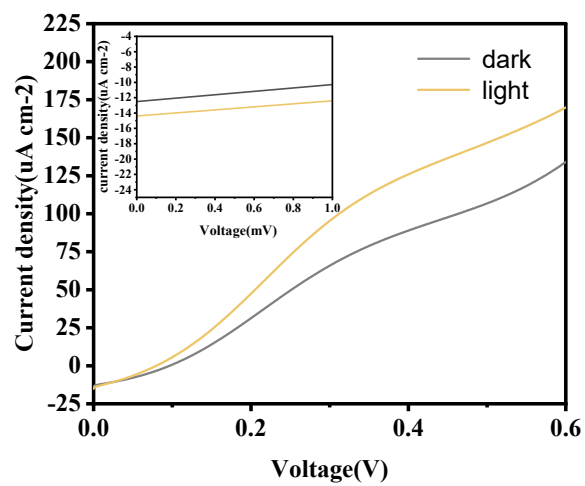

**Figure S2** Linear Sweep Voltammetry (LSV) characteristic curves of PANI/Bi<sub>2</sub>O<sub>2</sub>S under dark and light conditions.

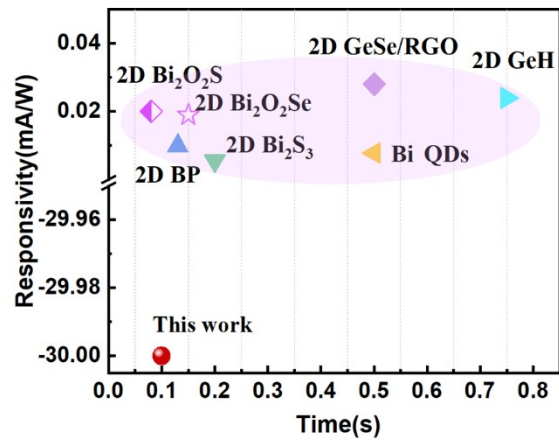

Figure S3 Performance comparison between different semiconductor materials.

## References

- S1. K. K. Korir, G. O. Amolo, N. W. Makau and D. P. Joubert, *Diamond and Related Materials*, 2011, **20**, 157-164.
- S2. G. Kresse and J. Furthmüller, *Physical Review B*, 1996, **54**, 11169.
- S3. J. P. Perdew, K. Burke and M. Ernzerhof, *Physical Review Letters*, 1996, **77**, 3865-3868.
- S4. c. xing, W. Huang, Z. Xie, J. Zhao, D. Ma, T. Fan, W. Liang, Y. Ge, B. Dong and J. Li, *ACS Photonics*, 2018, **5**, 621-629.
- S5. P. Chauhan, A. B. Patel, G. K. Solanki, H. K. Machhi, C. K. Sumesh, S. S. Soni, V. Patel and V. M. Pathak, *The Journal of Physical Chemistry C*, 2021, **125**, 14729-14740.
- S6. X. Yang, X. Liu, L. Qu, F. Gao, Y. Xu, M. Cui, H. Yu, Y. Wang, P. Hu and W. Feng, *ACS Nano*, 2022, **16**, 8440-8448.
- S7. K. Chen, S. Wang, C. He, H. Zhu, H. Zhao, D. Guo, Z. Chen, J. Shen, P. Li, A. Liu, C. Li, F. Wu and W. Tang, *ACS Applied Nano Materials*, 2019, **2**, 6169-6177.
- S8. N. Liu, H. Qiao, K. Xu, Y. Xi, L. Ren, N. Cheng, D. Cui, X. Qi, X. Xu, W. Hao, S. X. Dou and Y. Du, *Small*, 2020, **16**, 2000283.
- S9. L. Su, X. Tang, X. Fan, D. Ma, W. Liang, Y. Li and H. Zhang, *Advanced Functional Materials*, 2019, **29**, 1905857.
- S10. M. I. Zappia, G. Bianca, S. Bellani, M. Serri, L. Najafi, R. Oropesa-Nuñez, B. Martín-García, D. Bouša, D. Sedmidubský, V. Pellegrini, Z. Sofer, A. Cupolillo and F. Bonaccorso, *Advanced Functional Materials*, 2020, **30**, 1909572.
